# Supplementary material for: Genome-wide association study identified three major QTL for carcass weight including the PLAG1-CHCHD7 QTN for stature in Japanese Black cattle
Source: PubMed Central journal article supplement (PMC3403917; doi:10.1186/1471-2156-13-40), 2012-05-20

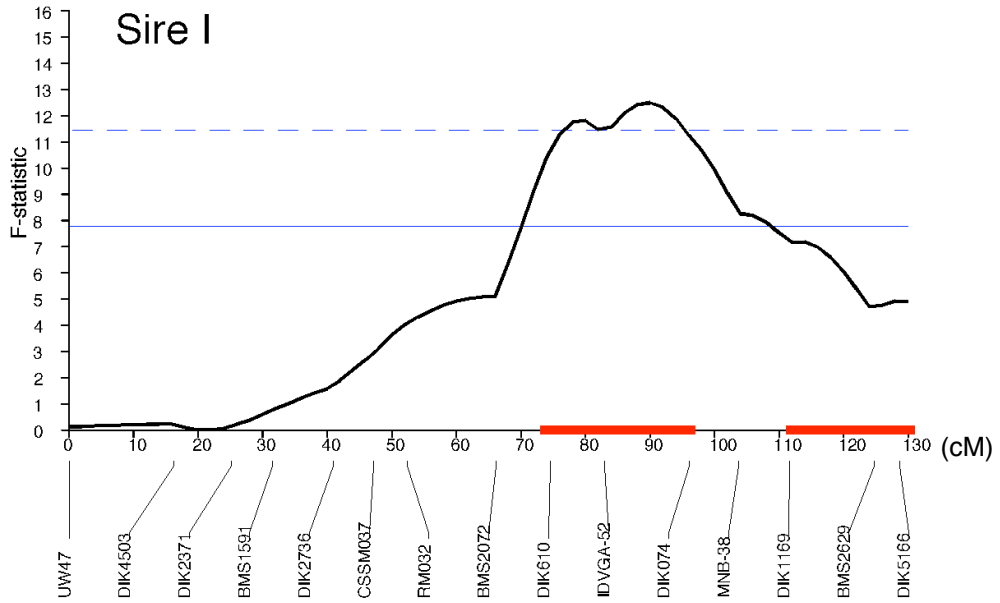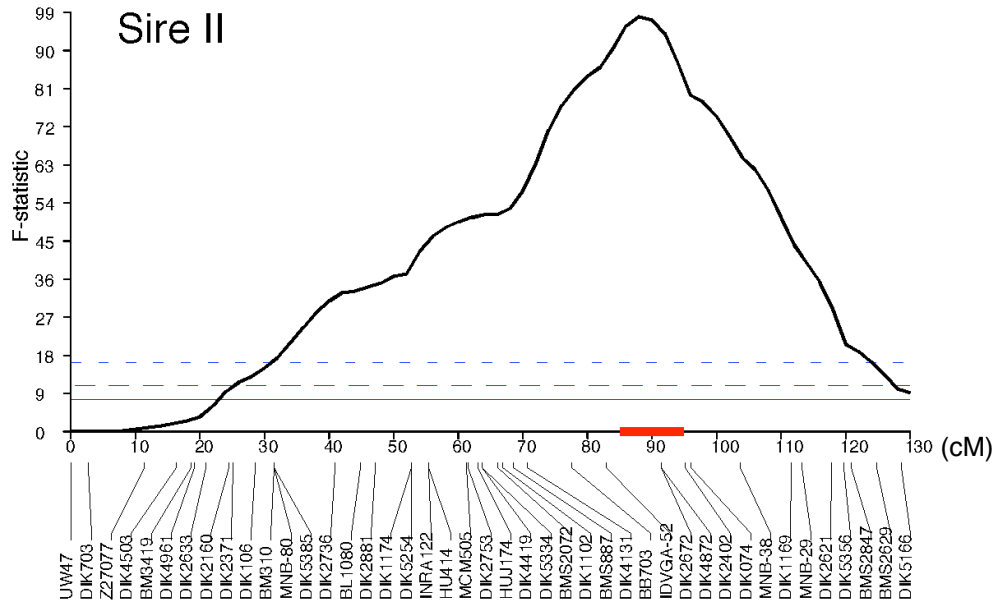

Supplement: 1471-2156-13-40-S4.pdf [file 1471-2156-13-40-S4.pdf]
