# Supplementary material for: Genome-wide association study identified three major QTL for carcass weight including the PLAG1-CHCHD7 QTN for stature in Japanese Black cattle
Source: Springer Nature journal article supplement (doi:10.1186/1471-2156-13-40), 2012-05-20

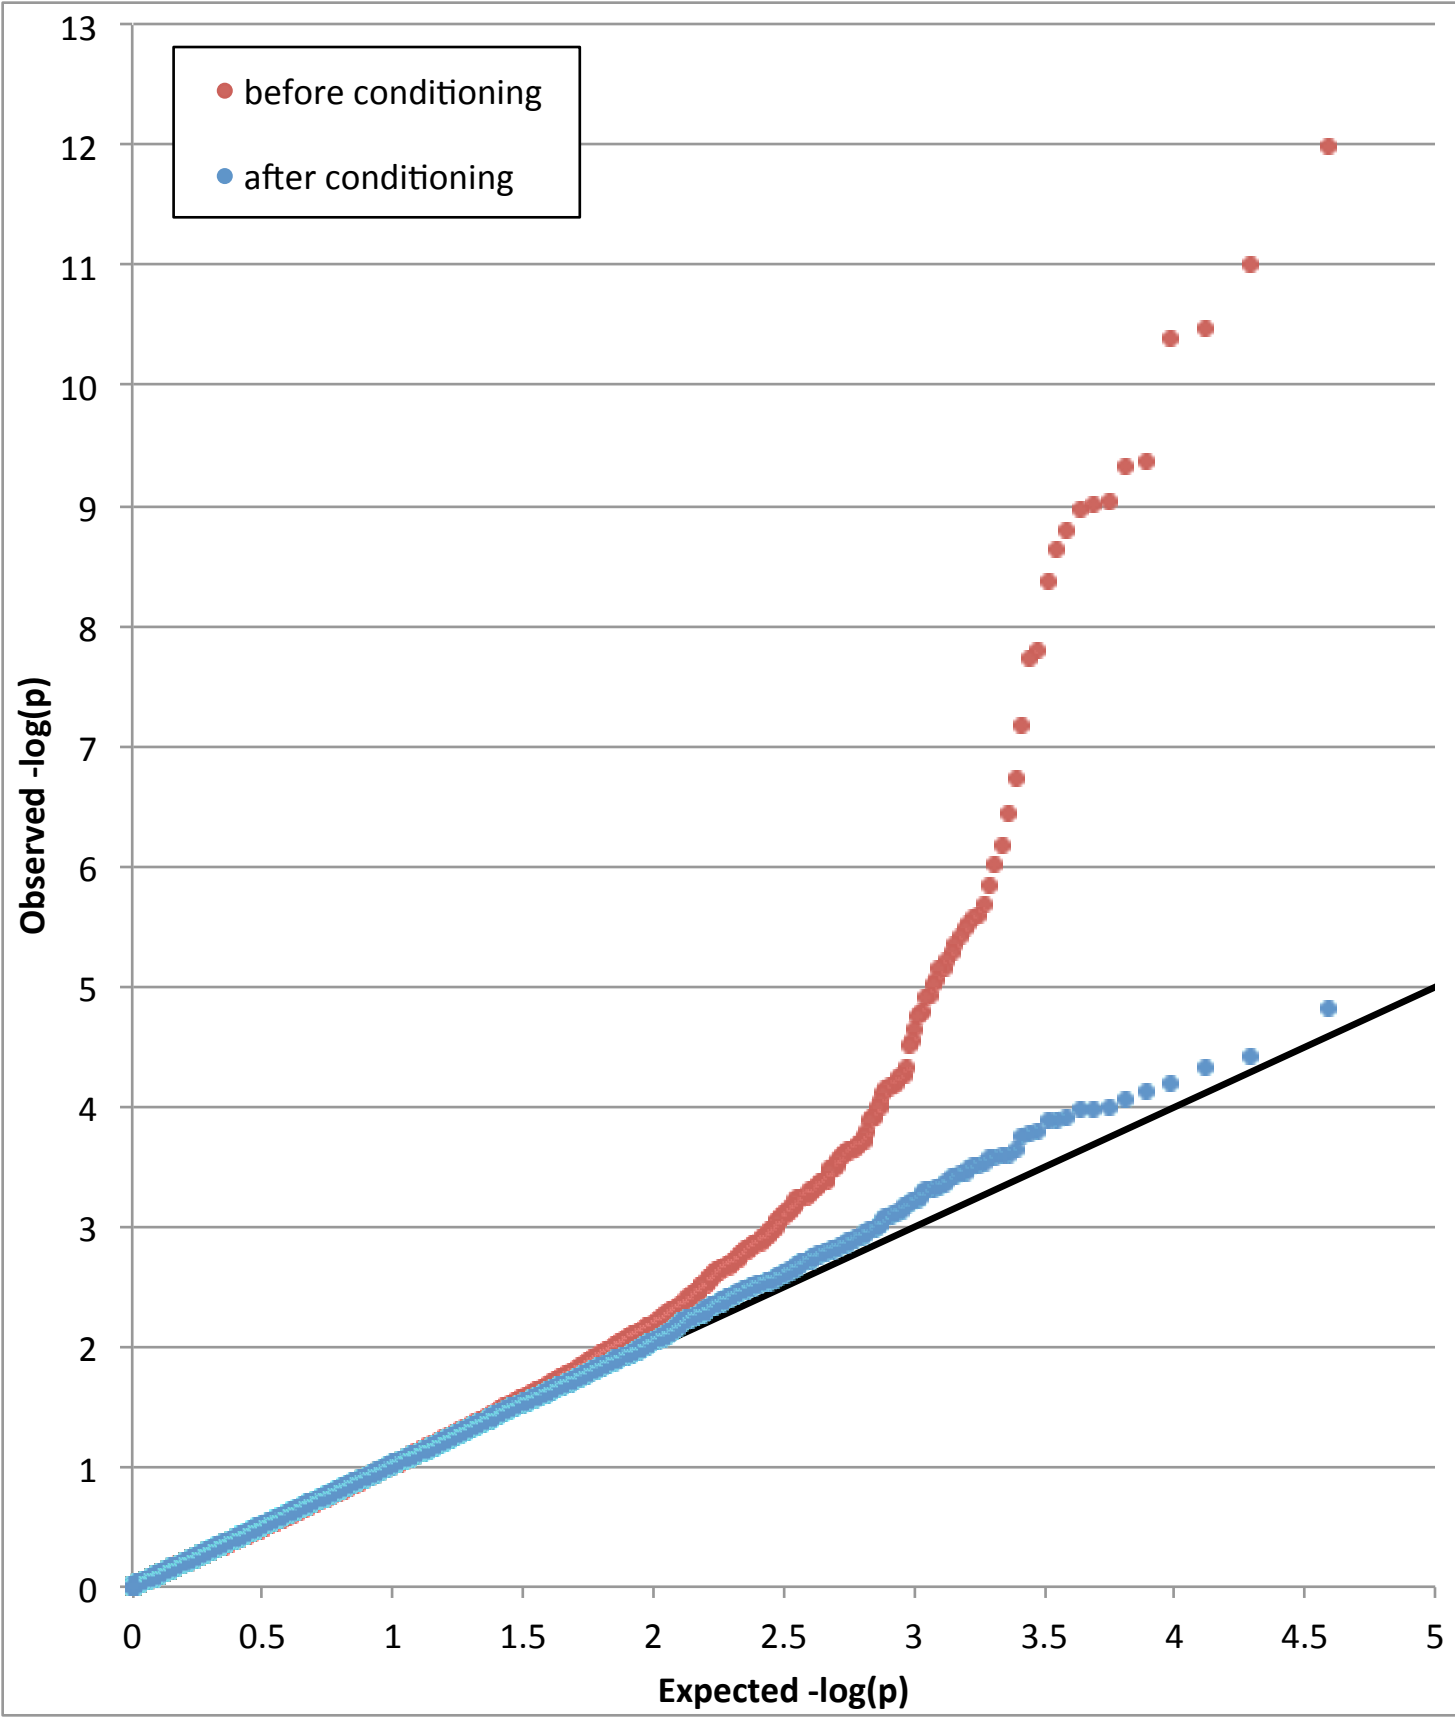

Supplement: 12863_2012_994_MOESM2_ESM.pdf [file 12863_2012_994_MOESM2_ESM.pdf]
