# Supplementary material for: Genome-wide association study identified three major QTL for carcass weight including the PLAG1-CHCHD7 QTN for stature in Japanese Black cattle
Source: BMC Genet. 2012 May 20;13:40. doi: 10.1186/1471-2156-13-40 (PMC3403917; doi:10.1186/1471-2156-13-40)
Supplement: Additional file 3 — SNP associated with carcass weight. The table shows genome-wide significant SNP. [file 1471-2156-13-40-S3.xlsx]

## Sheet: Sheet1
Additional file 3. SNP associated with carcass weight
SNP	BTA	Position (Btau4.0)	Allele substitution effect (kg)	p-value
ARS-BFGL-NGS-108417	6	27786721	26.6442	3.74369e-07
Hapmap43447-BTA-105138	6	35690336	26.0084	1.65816e-08
Hapmap50194-BTA-105136	6	35743451	28.4006	1.64766e-09
ARS-BFGL-NGS-642	6	35843839	34.9293	4.22198e-10
Hapmap48882-BTA-75976	6	36848688	34.8868	4.76757e-10
Hapmap25417-BTC-036670	6	37193155	34.7967	9.0515e-10
Hapmap27072-BTC-033816	6	37524838	32.9521	1.06709e-09
Hapmap30134-BTC-034283	6	37852400	30.8199	9.79326e-10
Hapmap26308-BTC-057761	6	37963147	35.4627	9.64846e-12
ARS-BFGL-NGS-45457	6	38102327	34.035	4.1405e-11
Hapmap33628-BTC-041023	6	38326147	33.9127	3.28556e-11
Hapmap32210-BTC-035534	6	39223437	33.1687	2.35268e-09
BTB-00357421	8	79625441	22.7759	3.02443e-06
Hapmap40466-BTA-82123	8	88041624	11.4186	0.216036
ARS-BFGL-NGS-63666	8	88677968	20.5304	6.81915e-08
ARS-BFGL-NGS-105750	8	89035763	19.6233	1.86916e-08
BTA-52694-no-rs	8	89397242	26.008	4.23646e-09
ARS-BFGL-NGS-29780	8	89419470	16.5728	5.14204e-06
Hapmap46986-BTA-34282	14	23519449	27.2012	1.02938e-12
Hapmap25446-BTC-054694	14	24122020	18.3537	6.7325e-07
Hapmap33173-BTC-073249	14	26051744	17.0659	9.67213e-07
ARS-BFGL-NGS-19050	14	26159209	18.1826	1.86464e-07
