# Supplementary material for: Genome-wide association study identified three major QTL for carcass weight including the PLAG1-CHCHD7 QTN for stature in Japanese Black cattle
Source: BMC Genet. 2012 May 20;13:40. doi: 10.1186/1471-2156-13-40 (PMC3403917; doi:10.1186/1471-2156-13-40)
Supplement: Additional file 7 — Haplotypes of Japanese Black sires. This table shows Q and q alleles in Japanese Black sires around the causative variations for bovine stature. [file 1471-2156-13-40-S7.xlsx]

## Sheet: Additional file 8
Additional file 7. Haplotypes of Japanese Black sires
BTA	Position (UMD3.1)	reference	Q	q
14	24805830	T	T	C
14	24833112	T	T	G
14	24834434	C	C	T
14	24843035	C	C	T
14	24843641	A	A	T
14	24845596	G	G	A
14	24973676	G	G	C
14	24973953	T	T	C
14	24974221	A	A	G
14	24974811	A	A	G
14	24977053	G	G	C
14	24991209	T	T	C
14	24991479	C	C	T
14	24991510	T	T	C
14	24995512	-	-	A
14	25003338	C	C	G
14	25006125	T	T	C
14	25015640	G	G	T
14	25019900	A	A	G
14	25022815	C	C	G
14	25031173	--	--	TT
14	25052396	(CCG)11	(CCG)11	(CCG)9
14	25052440	G	G	A
14	25059742	A	A	G
14	25061179	T	T	C
14	25069673	T	T	G
The Q alleles of the F1 (Holstein x Jersey) sires reported by Karim et al. (2011) were colored.
